# Supplementary material for: Contrasting diversity of vaginal lactobacilli among the females of Northeast India
Source: PubMed Central journal article supplement (PMC6712660; doi:10.1186/s12866-019-1568-6), 2019-08-27

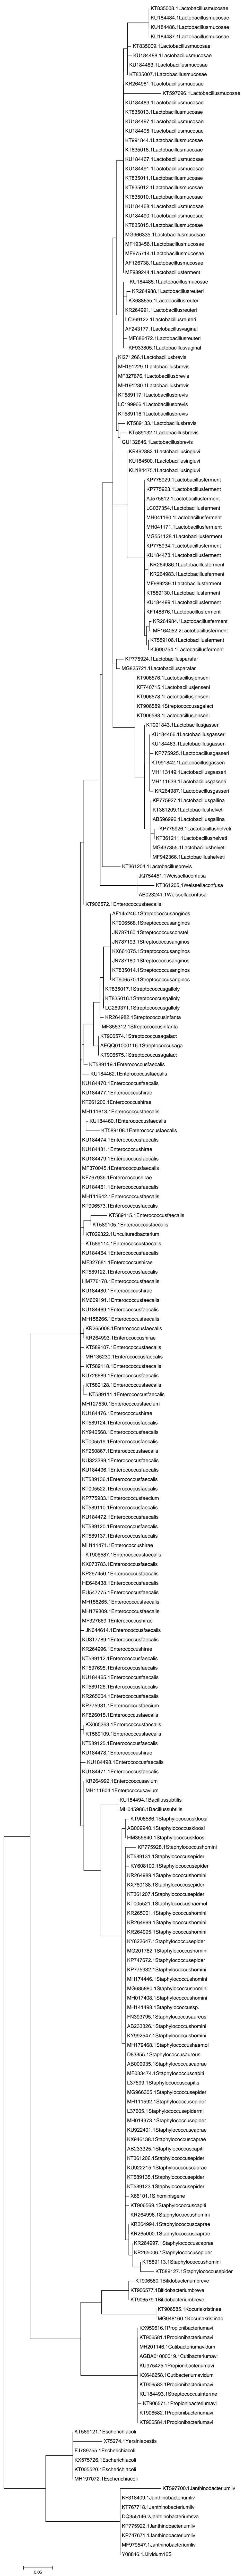

Supplement: 12866_2019_1568_MOESM6_ESM.pdf [file 12866_2019_1568_MOESM6_ESM.pdf]
